1 **Leveraging social network topology could improve the efficiency of SARS-CoV-2 epidemic**  
2 **control strategies in resource-limited contexts**

3

4 MV Evans<sup>1</sup>, T Ramiadantsoa<sup>1</sup>, K Kauffman<sup>2,3,4</sup>, J Moody<sup>5</sup>, C Nunn<sup>2,3</sup>, JY Rabezara<sup>6</sup>, P Raharimalala<sup>7</sup>,  
5 TM Randriamoria<sup>8,9</sup>, V Soarimalala<sup>8,10</sup>, G Titcomb<sup>4,11,12</sup>, A Garchitorena<sup>1,13</sup>, B Roche<sup>1</sup>

6

7 1. MIVEGEC, Univ. Montpellier, CNRS, IRD, Montpellier, France

8 2. Department of Evolutionary Anthropology, Duke University, Durham, North Carolina, USA

9 3. Duke Global Health Institute, Durham, North Carolina, USA

10 4. Ecology, Evolution, and Marine Biology, University of California, Santa Barbara, California,  
11 USA

12 5. Department of Sociology, Duke University, Durham, North Carolina, USA

13 6. Department of Science and Technology, University of Antsiranana, Antsiranana, Madagascar

14 7. Andapa, Madagascar

15 8. Association Vahatra, BP 3972, Antananarivo, Madagascar

16 9. Zoologie et Biodiversité Animale, Domaine Sciences et Technologies, Université  
17 d'Antananarivo, BP 906, Antananarivo 101, Madagascar

18 10. Institut des Sciences et Techniques de l'Environnement, Université de Fianarantsoa, BP  
19 1264, Fianarantsoa 301, Madagascar

20 11. Marine Science Institute, University of California, Santa Barbara, California, USA

21 12. Department of Fish, Wildlife and Conservation Biology, Colorado State University, Fort  
22 Collins, USA

23 13. NGO PIVOT, Ranomafana, Ifanadiana, Madagascar

24

25 Corresponding author: MVE (911 Avenue Agropolis Montpellier 34000 France; +33 06 51 21 75 62;  
26 mv.evans.phd@gmail.com)

27

28

29 **ABSTRACT**

30 Targeted surveillance allows public health authorities to implement testing and isolation strategies  
31 when diagnostic resources are limited. When transmission patterns are determined by social contact  
32 rates, the consideration of social network topologies in testing schemes is one avenue for targeted  
33 surveillance, specifically by prioritizing those individuals likely to contribute disproportionately to  
34 onward transmission. Yet, it remains unclear how to implement such surveillance and control when  
35 network data is unavailable, as is often the case in resource-limited settings. We evaluated the  
36 efficiency of a testing strategy that targeted individuals based on their degree centrality on a social  
37 network compared to a random testing strategy in the context of low testing capacity. We simulated  
38 SARS-CoV-2 dynamics on two contact networks from rural Madagascar and measured the epidemic  
39 duration, infection burden, and tests needed to end the epidemics. In addition, we examined the  
40 robustness of this approach when individuals' true degree centralities were unknown and were  
41 instead estimated via readily-available socio-demographic variables (age, gender, marital status,  
42 educational attainment, and household size). Targeted testing reduced the infection burden by  
43 between 5 - 50% at low testing capacities, while requiring up to 28% fewer tests than random testing.  
44 Further, targeted tested remained more efficient when the true network topology was unknown and  
45 prioritization was based on socio-demographic characteristics, demonstrating the feasibility of this  
46 approach under realistic conditions. Incorporating social network topology into epidemic control  
47 strategies is an effective public health strategy for health systems suffering from low testing capacity  
48 and can be implemented via socio-demographic proxies when social networks are unknown.

49

50 \*French abstract available in Supplemental Materials

## 51 INTRODUCTION

52 A key process of epidemic control is surveillance, whereby health systems test and isolate  
53 infectious individuals (1). However, many health systems lack the resources to test all symptomatic  
54 individuals and must allocate resources accordingly. This is particularly the case for emerging  
55 infectious diseases, such as SARS-CoV-2, where testing resources are unequally distributed across  
56 countries (2). As early as April 2020, the Africa Centers for Disease Control and Prevention called  
57 attention to the lack of SARS-CoV-2 diagnostics in the region (3). Indeed, serological surveys from  
58 multiple countries revealed infection burdens much higher than those predicted from case-based  
59 surveillance, an indication of underdiagnosis of SARS-CoV-2 cases by diagnostic systems (4–6).  
60 Testing is an integral part of the COVID-19 responses of sub-Saharan African countries (7), and the  
61 lack of adequate testing capacity is an impediment to public health efforts.

62 One way to mediate the limitation of low testing capacity is by using prioritized testing  
63 schemes, such as schemes that prioritize testing of only symptomatic individuals or testing of close  
64 contacts of known cases (8). Modeling studies have explored isolating sub-groups on social networks  
65 (9), prioritizing testing of close-contacts of infected individuals (10), expanding contact tracing to  
66 contacts of contacts (11), and reducing the overall number of contacts between individuals (12) as  
67 means to reduce transmission. Another potential strategy is to target surveillance of individuals or  
68 households based on their network characteristics, specifically their connectedness (13). For SARS-  
69 CoV-2, social contact heterogeneity has been identified as a primary driver of the distribution pattern  
70 of secondary infections, with a small proportion of infections causing a disproportionately high number  
71 of secondary infections (11,14). Given the strong role of social contacts, public health interventions  
72 that account for heterogeneity in social networks represent a promising avenue for implementing  
73 epidemiological surveillance in resource-limited contexts.

74 Targeted interventions can be particularly useful in contexts where surveillance and testing  
75 resources are limited, specifically by allocating these resources to individuals that may  
76 disproportionately contribute to community spread. A challenge to implementing this approach is that  
77 public health authorities rarely have access to social network data that would guide targeted  
78 surveillance (15,16). However, some socio-demographic variables predict connectivity on social  
79 networks and may therefore be useful proxies for the risk of spreading due to high contact rates when  
80 true social networks are not available. For example, a range of socio-demographic variables including  
81 age, household size and structure, income, and educational enrollment were used to predict age-  
82 specific contact rates across 152 countries (17). Similarly, socio-demographic variables such as  
83 gender, age, income, and education are used in marketing analytics to predict "central clients" (18).  
84 Thus, when it can be shown that socio-demographic variables predict network centrality, it may be  
85 possible to use those variables as proxies for the risk of onward transmission in targeted surveillance  
86 approaches. This would greatly increase the feasibility of including network topology in epidemic  
87 control.

88 Here, we use epidemic simulations on empirical and simulated social networks to investigate  
89 the effectiveness of targeted testing of highly connected individuals to control an epidemic when  
90 testing capacity and social network information is limited. We simulate SARS-CoV-2 outbreaks on

91 two close-contact social networks derived from social and spatial movement data on individuals living  
92 in rural communities in the Sambava district of the SAVA region in northeastern Madagascar (19).  
93 We then compare the effectiveness of testing strategies that target testing based on social  
94 connectivity to those that test randomly using the full knowledge of the social network, evaluating the  
95 time needed to control the epidemic, the total infection burden, and the number of tests needed.  
96 Finally, we repeat the simulations using socio-demographic variables (age, household size, marital  
97 status, educational attainment) from the study population to guide targeted testing, rather than  
98 information on individuals' degree centralities from the social networks, thus investigating whether  
99 these commonly available data are suitable proxies for heterogeneity in transmission.

100

## 101 **RESULTS**

### 102 ***Madagascar Social Network Topology***

103 The social networks from Mandena and Sarahandrano in rural Madagascar had characteristics of  
104 networks where heterogeneous transmission patterns are likely to occur. The Mandena network  
105 contained 120 nodes and 4136 total edges, with a mean node degree of 34.47 and normal degree  
106 distribution. However, the distribution of edge weights was strongly left-skewed. The mean edge-  
107 weight was 0.18, but less than two percent of edges had a weight above 1 (equal to 24 hours over a  
108 week-long period). The majority of edge weights were below 0.05, equivalent to 80 minutes of close  
109 contact a week. The Sarahandrano network contained 318 nodes and 16140 total edges, with a  
110 mean node degree of 50.7 and a normal degree distribution. Like the Mandena network, the  
111 distribution of edge weights was strongly left-skewed, but degree centrality was overall higher than on  
112 the Mandena network. The mean edge-weight was 0.31, with 614 edges, or 3.8%, having a weight  
113 above 1. Fifty-percent of edge-weights were below 0.08.

114

### 115 ***Control Efficiency***

116 We compared the control efficiency of targeted and random surveillance strategies at low and high  
117 testing capacities, corresponding to the ability to test 25% and 100% of the population monthly. The  
118 targeted strategy had the largest effect on reducing daily incidence while using the fewest tests,  
119 particularly at a 25% testing capacity (Fig. 1, Fig. 2). For all three measures of effectiveness, targeted  
120 testing was more effective on the Mandena network than the Sarahandrano network (Fig. 2, Table 1).  
121 An uncontrolled epidemic, with no testing, resulted in a median of 0.82 infections per capita on the  
122 Mandena network and 0.94 infections per capita on the Sarahandrano network (Table 1, Fig. 2). In  
123 contrast, at a monthly testing capacity of 25%, targeting highly connected individuals resulted in a  
124 median of 0.41 and 0.90 new infections per capita on the Mandena and Sarahandrano networks,  
125 respectively (Table 1, Fig. 2). The infection burden decreased with increasing testing capacity for  
126 both control strategies, but the random testing strategy was most sensitive to an increase in testing  
127 capacity (Table 1, Fig. 2).

128

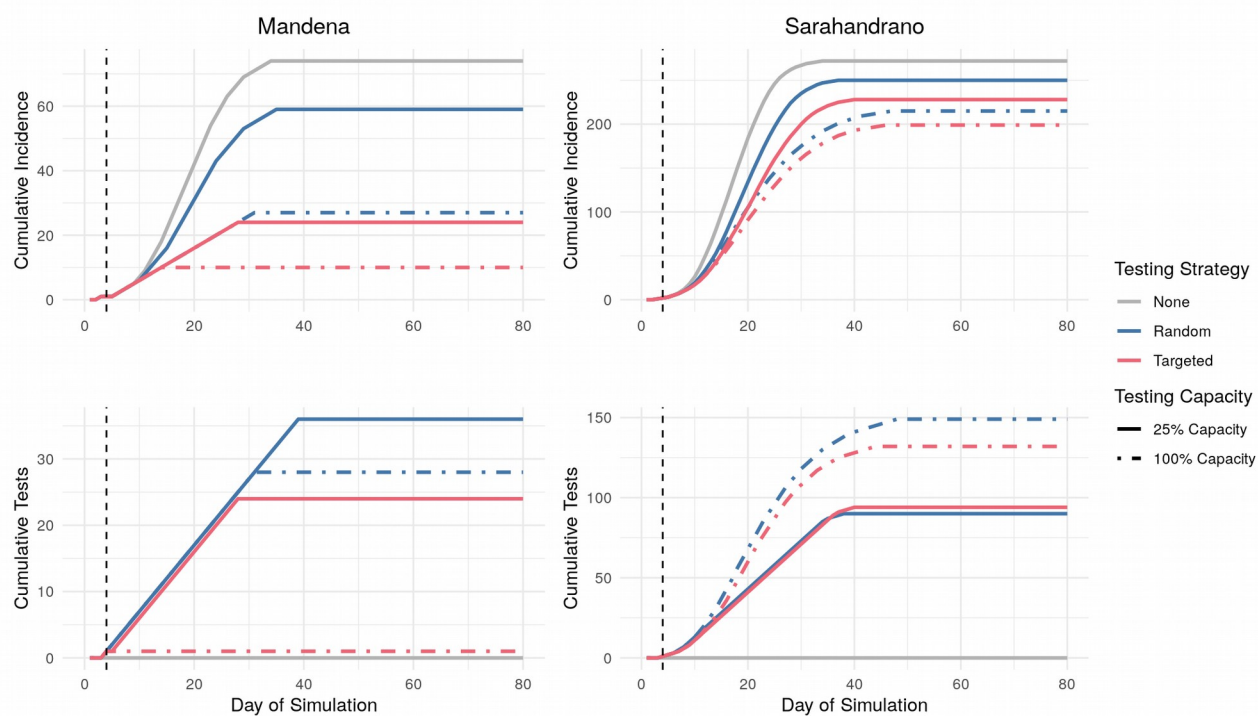

129  
130  
131  
132  
133  
134  
135  
136

**Figure 1. Targeted testing reduces daily incidence while requiring fewer tests than random testing.** Cumulative daily incidence (top row) and cumulative tests required (bottom row) for the two testing strategies across two testing capacities on the Mandena and Sarahandrano networks. Testing capacities refer to ability to test a percentage of the total population monthly. The vertical dashed line represents the start of the control strategies at day 4. Lines represent median values from 1000 simulations.

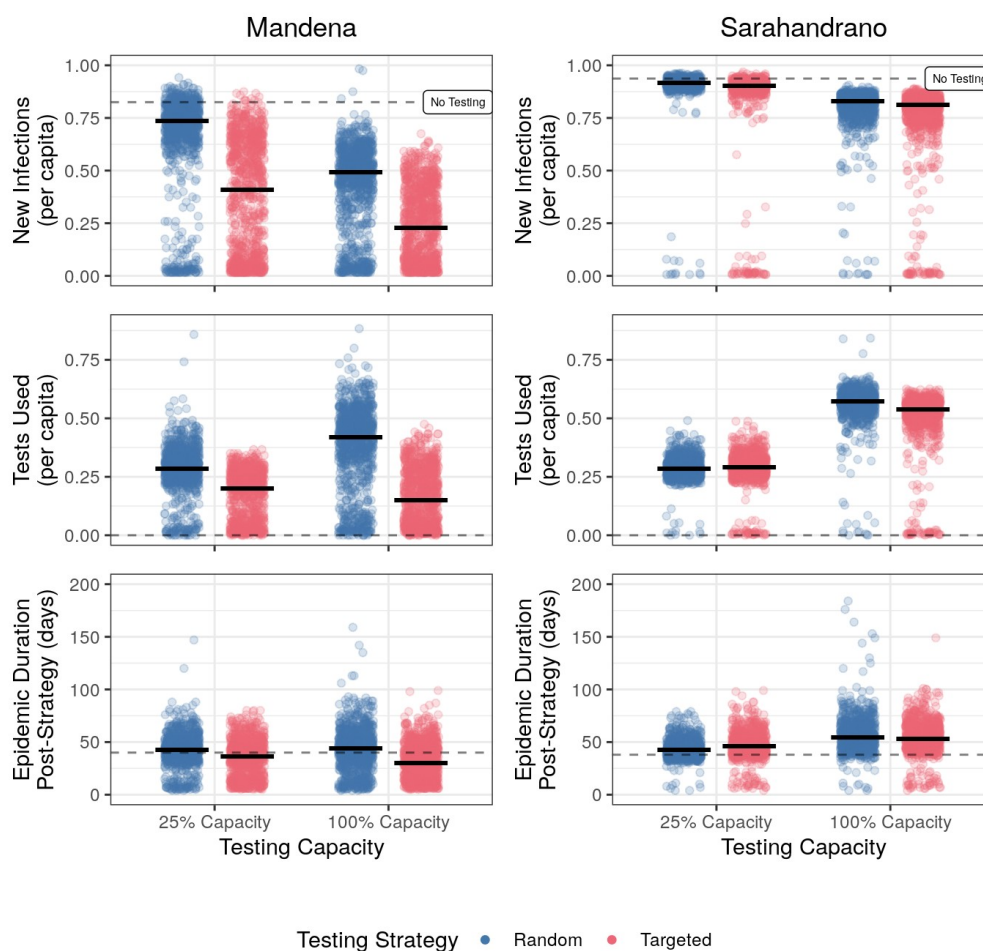

137

138 **Figure 2. Targeted testing reduces the total infection burden and the number of tests**  
139 **needed, even at low testing capacities.** Comparison of efficiency of two control strategies at two  
140 testing capacities on the Mandena and Sarahandrano networks. Testing capacities correspond to  
141 monthly testing capacities equal to testing 25% and 100% of the total population. The dashed black  
142 line represents median values from simulations with no testing. Raw data is represented by points  
143 and median values per strategy are represented by bold horizontal lines. The figure displays results  
144 from 1000 simulations for each combination of testing capacity and control strategy.

145

146

147 **Table 1. Median and 95% CI of efficiency metrics for two control strategies on two**  
 148 **empirical social contact networks from rural Madagascar.** Represents median and confidence  
 149 intervals from 1000 simulations. Testing capacity corresponds to monthly testing capacity, with 100%  
 150 equal to the ability to test the full population monthly. Note that efficiency at 0% testing capacity is the  
 151 same for both strategies because it represents the control strategy of no testing.

|                       |                  | Mandena Network     |                     | Sarahandrano Network |                     |
|-----------------------|------------------|---------------------|---------------------|----------------------|---------------------|
| Efficiency Metric     | Testing Capacity | Random Testing      | Targeted Testing    | Random Testing       | Targeted Testing    |
| Epidemic Duration     | 0%               | 44<br>(13,67)       | 44<br>(13,67)       | 42<br>(33,58)        | 42<br>(33,58)       |
|                       | 25%              | 46<br>(11,73)       | 40<br>(10.75, 71)   | 46<br>(36,67.1)      | 50<br>(16,76)       |
|                       | 100%             | 48<br>(11,88)       | 34<br>(11,71)       | 58<br>(39,91)        | 57<br>(16,89)       |
| Infections Per Capita | 0%               | 0.82<br>(0.03,0.87) | 0.82<br>(0.03,0.87) | 0.94<br>(0.91,0.97)  | 0.94<br>(0.91,0.97) |
|                       | 25%              | 0.73<br>(0.02,0.87) | 0.41<br>(0.02,0.78) | 0.92<br>(0.87,0.95)  | 0.90<br>(0.01,0.94) |
|                       | 100%             | 0.49<br>(0.02,0.69) | 0.22<br>(0.02,0.57) | 0.83<br>(0.54,0.88)  | 0.81<br>(0.01,0.87) |
| Tests per Capita      | 25%              | 0.28<br>(0,0.45)    | 0.20<br>(0.01,0.32) | 0.28<br>(0.22,0.38)  | 0.29<br>(0.01,0.41) |
|                       | 100%             | 0.42<br>(0.02,0.64) | 0.15<br>(0.01,0.39) | 0.57<br>(0.39,0.66)  | 0.54<br>(0.01,0.6)  |

152

153

154

155 Testing was more efficient when targeting highly connected individuals on the Mandena  
 156 network, requiring less than three-quarters of the number of tests needed when testing randomly at  
 157 25% capacity. This was equivalent to 34 tests when testing randomly and 24 tests with targeted  
 158 testing. In contrast, both testing strategies used similar numbers of test on the Sarahandrano  
 159 network, approximately 89 tests. Targeted testing only shortened the epidemic length on the  
 160 Mandena network (Table 1, Fig. 2), where it was able to stop transmission chains earlier in the  
 161 epidemic than random testing (Fig. 1, Fig. 3). On the Sarahandrano network, both control strategies  
 162 flattened the epidemic curve by reducing the number of infections, and this prolonged the epidemic by  
 163 preventing rapid spread through the population, as was seen in the simulations without testing (Fig. 1,  
 164 Fig. 2).

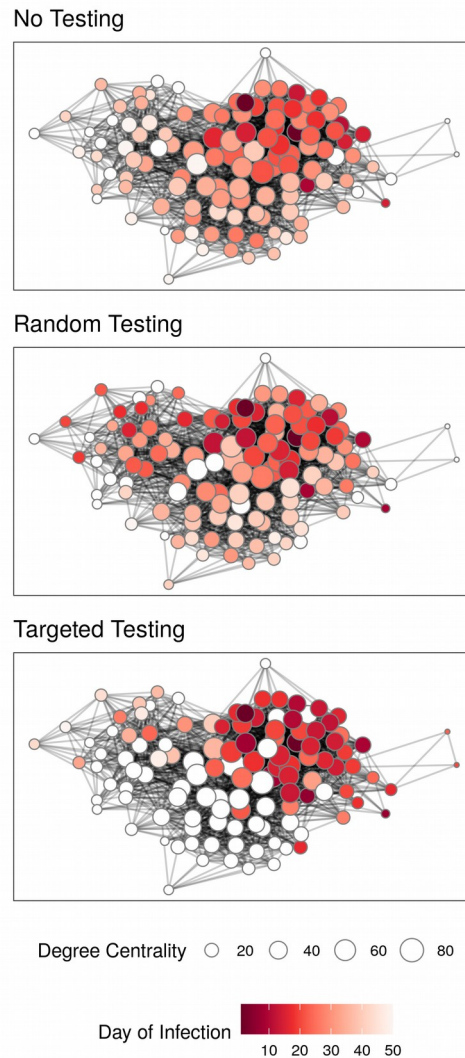

165

166 **Figure 3. Targeted testing most efficiently reduces disease spread across social networks.**  
167 Final epidemic spread of one simulation on the Mandena network for three different control strategies.  
168 Nodes are represented by points, colored based on day of infection, and sized according to their  
169 degree centrality. Nodes that were never infected are white. All control strategies used a monthly  
170 testing capacity of 25%.

171

172 Visualizing a simulated SEIR epidemic on the Mandena network illustrates how each strategy  
173 works at a fine scale (Fig. 3). The strategy of no control allowed for the highest infection burden,  
174 including individuals with low centrality who were infected later in the epidemic than in other  
175 strategies. Testing randomly did stop some transmission chains, but transmission rapidly spread  
176 early in the epidemic, with the highest daily incidence of 7 cases on day 32 of the epidemic. In  
177 contrast, targeted testing slowed transmission by halting transmission chains that would result in a  
178 high number of secondary infections (Fig. 3); daily incidence never rose above 5 cases. This resulted  
179 in a longer epidemic duration of 50 days, but daily incidence during the second half of the epidemic  
180 was never above one new infection per day.

181

182 We conducted sensitivity analyses to identify scenarios in which targeted testing is more  
183 efficient than random testing. Across all three categories of the sensitivity analyses, targeted testing  
184 remained the most efficient strategy (Fig. S4.1 - S4.5). The efficiencies of both strategies became  
similar when testing capacity was low and testing began 15 days after the start of the epidemic, after



185 which most individuals in the network had already been infected, and testing could do little to control  
186 the infection burden (Fig. S4.1). The relative efficiency was also reduced at low levels of  
187 ascertainment, particularly below levels of 0.25, when infected individuals only had a 0.25 probability  
188 of being correctly identified and tested (Fig. S4.2). At this point, the low accuracy of ascertainment  
189 reduced the ability to identify highly connected individuals for targeted testing. Targeted testing was  
190 more effective than random testing at all transmission rates, but was most effective at transmission  
191 rates between 0.15 and 0.23 (Fig. S4.3). At lower transmission rates, daily incidence was low enough  
192 that random testing could test most infected individuals. At higher transmission rates, the epidemic  
193 spread quickly and many individuals were already infected when testing began on day 4. Higher  
194 testing capacities increased the relative effectiveness of targeted testing at high transmission rates  
195 and decreased the relative effectiveness at low transmission rates. Sensitivity analyses concerning  
196 network size were highly stochastic; however, targeted testing always resulted in a lower infection  
197 burden than random testing (Fig S4.4). Similarly, there were few clear differences between the two  
198 testing strategies on networks of different assortativity values, with very small magnitudes of  
199 difference between the two strategies (Fig. S4.5).

200

### 201 ***Applying Control Strategies to Networks with Unknown Topologies***

202 We focused on five socio-demographic variables as predictors of an individual's degree  
203 centrality: age, gender, household size, marital status, and education level. A model including socio-  
204 demographic variables did a poor job of predicting degree percentile across the two networks ( $R^2 =$   
205 0.03). However, the model was able to rank individuals by degree centrality (Mandena Spearman's  $\rho$   
206 = 0.15 ( $p=0.09$ ); Sarahandrano Spearman's  $\rho = 0.18$  ( $p=0.002$ )). The model distinguished high-  
207 degree individuals from low-degree individuals: the top ten individuals in each network had a  
208 predicted degree that was on average approximately twice as high as the bottom ten individuals (Fig.  
209 S3.3). Marital status was the only variable included in all models within 4 AIC units of the top model,  
210 but all socio-demographic variables were included in the averaged model. Specifically, cohabiting  
211 individuals had lower degree centrality than single individuals. Further details are reported in the  
212 Supplementary Materials.

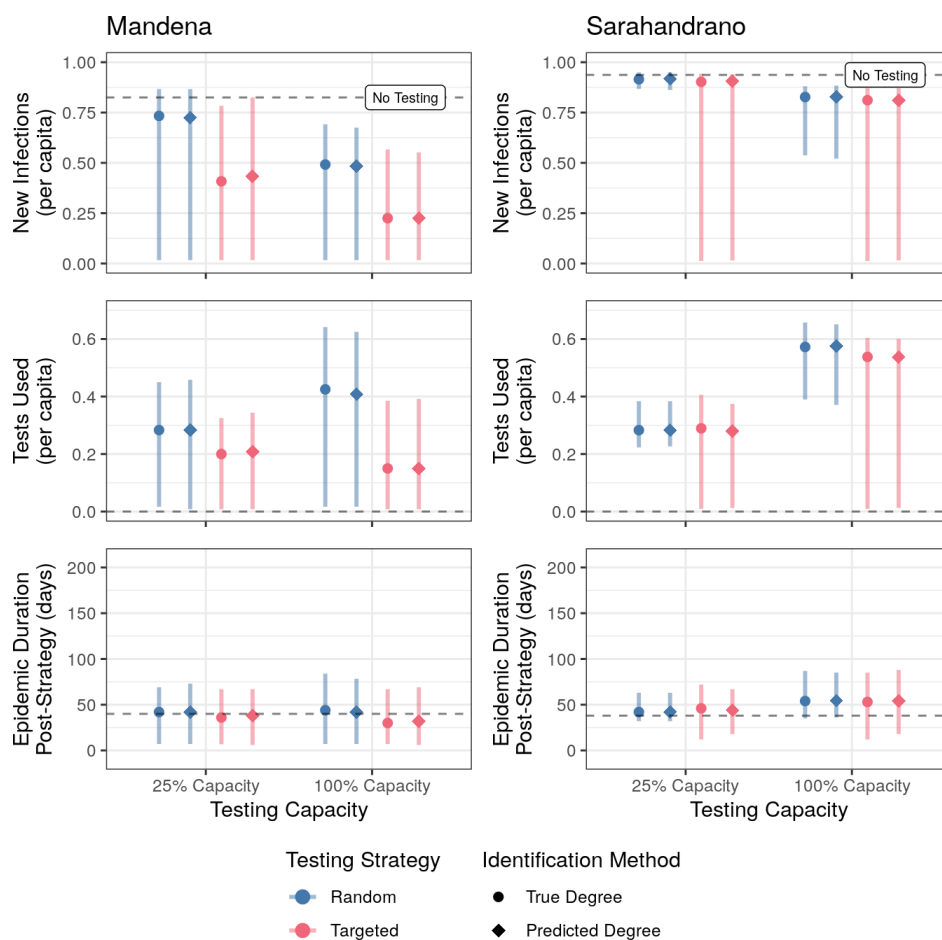

213

214 **Figure 4. Targeted testing based on individuals' degree centrality proxies performs**  
 215 **similarly to targeted testing based on individuals' known degrees.** Comparison of efficiency of  
 216 two control strategies at two testing capacities on the Mandena and Sarahandrano networks using  
 217 true degree centralities (circles) or degree centralities predicted from socio-demographic variables  
 218 (diamonds). Testing capacities correspond to monthly testing capacities equal to testing 25% and  
 219 100% of the total population. The dashed black line represents median values from simulations with  
 220 no testing. Points represent the median and error bars the 95%CI based on 1000 simulations.

221

222 Despite the poor capacity of socio-demographic variables to predict degree percentile, the  
 223 predictions based on socio-demographic variables performed remarkably well in guiding the targeted  
 224 testing strategy. Indeed, testing based on these centrality "proxies" was as effective as using "true"  
 225 centralities obtained from a social network (Fig. 4). The infection burden was slightly higher when  
 226 using estimated degree centralities to target testing, but it remained lower than strategies of no  
 227 testing and testing randomly. Although socio-demographic characteristics were not strong predictors  
 228 of absolute degree centrality values, we found that their ability to differentiate between very high and  
 229 low connected individuals was enough to successfully implement a control strategy that considers  
 230 network topology.

231

## 232 DISCUSSION

233 In the face of global diagnostic and vaccine inequity, many countries are tasked with developing novel  
 234 public health interventions that optimize limited diagnostic capacities to control the SARS-CoV-2

235 epidemic. Given the role of social contact variation in community transmission of SARS-CoV-2, we  
236 explored whether control strategies that consider social network topologies, specifically individuals'  
237 degree centralities, could limit disease transmission while using fewer resources than current, non-  
238 prioritized testing strategies. We found that strategies that target well-connected, infected individuals  
239 are the most effective, reducing epidemic duration and overall infection burden, particularly at low  
240 testing capacities. In fact, in simulations on empirical social contact networks from rural Madagascar,  
241 targeted testing reduced the infection burden and shortened the epidemic even at a testing capacity  
242 of only one test per day, equivalent to a monthly testing capacity of 25% of the population. These  
243 strategies were robust even when targeting was imperfect due to unknown network topologies and  
244 based solely on socio-demographic variables. Importantly, this implies that this theoretical network-  
245 based approach is feasible in practice because it can be implemented using commonly available data  
246 on individuals, such as age, marital status, and household size. Our findings therefore demonstrate  
247 the benefits of considering social network topology in data-driven epidemic control strategies even  
248 when social network data is incomplete or not available.

249 We find that strategies that prioritize testing highly connected individuals offer the most benefit  
250 in contexts with low testing capacities. In our simulations, this is achieved by controlling the epidemic  
251 before it reaches the point at which limited testing capacity cannot contain it. However, even when the  
252 start of testing is delayed by 24 days, the targeted strategy can avoid on average nine infections on  
253 the Mandena network, or 0.075 infections per capita (Fig. S4.1). Early, aggressive testing has been  
254 used to successfully control SARS-CoV-2 in several countries (South Korea: (20), New Zealand:  
255 (21)), and a similar mechanism explains why strategies that target highly connected individuals are so  
256 efficient in our simulations. In addition to delayed testing, high transmission rates can result in  
257 epidemics that targeted testing is unable to control at limited testing capacities. This was seen in our  
258 sensitivity analyses (Fig. S4.3) and on the Sarahandrano network, where higher average edge  
259 weights resulted in higher community transmission than on the Mandena network. On the  
260 Sarahandrano network, 12 individuals (95% CI: 2- 36) had already been exposed by the start of  
261 testing on day 4, and neither testing strategy effectively controlled an epidemic at low testing  
262 capacities (Fig. 2, Table 1). The relatively low connectivity between rural communities in sub-  
263 Saharan Africa has been proposed to slow the epidemic pace of SARS-CoV-2, as compared to the  
264 US or Europe (22). However, at the community-scale, such as those portrayed in our empirical  
265 networks, connectivity between individuals was high. Therefore, at this scale, epidemics may spread  
266 rapidly following an initial introduction, and implementing measures quickly are key to limiting  
267 infections. Notably, at the beginning of the pandemic in 2020, many African countries implemented  
268 control measures more quickly than European countries (23), effectively limiting spread during the  
269 first wave of the epidemic. Our simulations show that implementing targeted testing strategies at the  
270 beginning of local epidemics similarly reduces disease burdens while requiring few testing resources.

271 While the concept of developing a disease control strategy configured by a social network is  
272 not novel (12,24,25), this study is one of the few that explicitly considers limited testing capacities on  
273 par with those in low-income countries. Madagascar tested 26,425 individuals (less than 0.01% of the  
274 total population) for SARS-CoV-2 between March and September 2020 (26), only a fraction of the

275 testing capacity required by mass-testing campaigns that have been implemented elsewhere (e.g.  
276 Slovakia, (27)). This is further complicated by the relative remoteness of some communities, with  
277 more than 50% of the population living further than two hours from a hospital (28). In both Mandena  
278 and Sarahandrano, for example, no SARS-CoV-2 testing has been available to date. While cost and  
279 physical access to testing are significant barriers to disease control in Madagascar (29), our findings  
280 suggest that, if and when testing is available to rural communities, targeted testing can mitigate the  
281 negative impact of limited testing capacity on epidemic control. For example, antigen-based rapid  
282 diagnostic testing is inexpensive, does not require refrigeration, provides instant results, and could be  
283 implemented at a local scale via outreach teams of skilled health workers (7). However, for prioritized  
284 testing schemes such as this to be possible, the global inequality in access to rapid diagnostic tests  
285 must first be overcome (30).

286 Many theoretical studies have shown the effectiveness of incorporating network topology into  
287 epidemic control strategies (31,32), but the feasibility of doing so has been questioned because the  
288 true social network is almost never known. One alternative is occupationally-targeted strategies that  
289 target high contact rates or high risk environments (e.g. health-care or food service worker) (33).  
290 However, in rural communities such as Mandena and Sarahandrano, all community members are  
291 agriculturalists, with little variation in occupation. To overcome this obstacle, we considered socio-  
292 demographic predictors of network centrality to guide targeted testing rather than the true values of  
293 network centrality or occupationally-based targeting. While demographic predictors did not accurately  
294 rank individuals by degree centrality, they were able to distinguish between individuals with high and  
295 low contact rates. Despite this imperfect predictive performance, estimated measures of degree  
296 centrality based on common socio-demographic variables performed as well as “true” degree  
297 centrality when used to prioritize testing schemes in our simulated epidemics. Health authorities can  
298 implement targeted control strategies by taking into account easy to measure individual  
299 characteristics (e.g. age, gender, household size, marital status), many of which are available in  
300 healthcare and governmental records, or can be quickly generated through surveys. The exact socio-  
301 demographic variables to include will vary depending on local demographics and cultural practices,  
302 and will require input from local experts. For example, in urban communities or communities with  
303 higher market integration, degree centrality may be more closely related to economic activities (e.g.  
304 workforce labor, commuting dynamics, income levels), rather than the social ties (e.g. marital status,  
305 household size) found on our rural networks. Further, when an incomplete network exists, it could be  
306 used to validate whether proposed demographic variables covary with degree centrality in that  
307 community. We found that even imperfect models can inform prioritization strategies if they are able  
308 to differentiate the most connected from the least connected individuals. This suggests that a high  
309 level of predictive performance is not necessary to successfully integrate social network topologies  
310 into control strategies via socio-demographic proxies. This robustness to low predictive performance  
311 of socio-demographic variables further supports the feasibility of this approach in settings where  
312 social network and socio-demographic data quality and availability may be low.

313 We included two social networks from rural Madagascar in our study to assess the  
314 generalizability of our results among rural communities. Targeted testing was more efficient on the

315 Mandena network than the Sarahandrano network, where no testing strategy could control epidemics  
316 at low testing capacities. Epidemics spread very quickly on the Sarahandrano network due to the  
317 combination of highly connected individuals (mean degree centrality of 50.7) and a high disease  
318 transmission rate ( $R_0 = 12.48$ ). Our sensitivity analyses confirmed that the effectiveness of targeted  
319 testing was dependent on the transmission rate of the disease (Fig S4.3), and targeted testing may  
320 not be appropriate when disease transmission is extremely low or high. This agrees with other  
321 mathematical models of SARS-CoV-2, which show that the effectiveness of testing to control  
322 epidemics becomes limited at increasing transmission rates (10,13). However, socio-demographic  
323 variables performed equally well as proxies for true degree centrality on both networks (Fig. S3.3, Fig.  
324 4). Therefore, although the benefit of targeted testing is dependent on the characteristics of the  
325 pathogen and social network, the ability to implement targeted testing via socio-demographic proxies  
326 appears generalizable, at least in rural contexts. Future research on a diversity of social networks is  
327 needed to explore the efficiency of these strategies in other contexts.

328 Our social networks represented realistic, but necessarily simplified versions, of true social  
329 networks. For example, we assumed social contacts were static and did not change, either as a result  
330 of dynamic social behavior (34), or changes in behavior due to the epidemic (e.g. social distancing).  
331 However, our simulations were relatively short, lasting less than three months on average, and static  
332 networks have been successfully used to model rapid epidemics, such as SARS-CoV-1 (35). Our  
333 social networks necessarily only included individuals over 18 years old, who represent less than 50%  
334 of the population nationally. Although contact patterns may differ for individuals under 18 years old,  
335 our sensitivity analyses found that the targeted strategy was most effective for a variety of network  
336 topologies, suggesting these results will hold when applied to the full network of all ages. In addition,  
337 the small size of our networks (120 and 318) meant that epidemics were short and highly influenced  
338 by stochasticity, which we attempted to control for by simulating 1000 epidemics with different initial  
339 conditions. By using empirical social contact networks, we included realistic social network topologies  
340 that more accurately represent exposure risk in rural Madagascar than simulated networks or  
341 networks based on studies from the Global North, where the majority of social networks originate  
342 from. A recent meta-analysis found only four social contact studies, less than 7% of those included in  
343 the meta-analysis, incorporated data from sub-Saharan Africa (36). Expanding social network data  
344 collection outside of the Global North would allow for more realistic and context-specific estimates of  
345 disease dynamics on social networks globally.

346 Incorporating social network topology into SARS-CoV-2 interventions greatly increases the  
347 efficiency of control strategies under limiting testing capacities. Our theoretical model found that  
348 prioritized testing of highly-connected individuals reduced the infection burden while using fewer tests  
349 than random testing under low-testing capacity. These control strategies were effective even when  
350 the true network topology was unknown and testing was prioritized using only common socio-  
351 demographic variables. Incorporating a similar strategy could aid countries with limited diagnostic  
352 resources to manage the SARS-CoV-2 epidemic and other infectious disease outbreaks within their  
353 communities. Importantly, this theoretical study focused on testing to control the epidemic at the

354 population level, and assumed that diagnostics are not tied to treatment. SARS-CoV-2 control  
355 strategies should be adapted according to a country's public health policy to ensure that vulnerable  
356 populations do not lose access to diagnostics and treatment. While our study focused on SARS-CoV-  
357 2, testing strategies that consider network topology may be useful for other diseases with similar  
358 transmission pathways, particularly when social contact drives transmission. This simulation  
359 approach could be easily re-parameterized to characterize different diseases of interest. As social  
360 contact network data becomes more widely available, considering social network topology is a  
361 promising method for allocating limited resources during public health crises.

362

## 363 **METHODS**

### 364 ***Social Contact Networks***

365 We modeled SARS-CoV-2 dynamics using a susceptible-exposed-infected-recovered (SEIR) model  
366 simulated across undirected networks where each individual was represented explicitly as a node in  
367 the network and their contacts by edges. Importantly, we modeled epidemics on empirical social  
368 networks, rather than simulated ones, to ensure our results were most relevant to settings with limited  
369 testing capacities. Empirical contact networks contain unique network topologies that may be lacking  
370 from simulated networks and more accurately represent the true social structure of a population, with  
371 important consequences for disease transmission (37). However, half of all empirical social contact  
372 networks used in epidemic modeling are derived from European contexts (36), where SARS-CoV-2  
373 testing capacities are relatively high. To ensure our results were most relevant to settings with limited  
374 testing capacities, we simulated epidemics on two contact networks obtained from rural communities  
375 in Madagascar, where testing capacities are currently limited.

376 The social contact networks were constructed using survey and GPS tracker data of  
377 consenting adults (over 18 years of age) living in two villages in the SAVA region of northeastern  
378 Madagascar. The first village, Mandena ( $14^{\circ}28'36''$  S  $47^{\circ}48'50''$  E), as described by Kauffman et al.  
379 (19), has approximately 2700 people (based on census data from local authorities). The second  
380 village, Sarahandrano ( $14^{\circ}36'27''$  S  $49^{\circ}38'50''$ ), is home to approximately 900 people. Data  
381 collection occurred over 7 weeks in Mandena and over 3 separate sampling periods, ranging from 5  
382 to 8 weeks each over a 9-month time period, in Sarahandrano. Subjects participated in a social  
383 network survey that asked for information on individuals with whom they have regular contact or  
384 supportive social relationships. These social surveys were used for recruitment of additional  
385 individuals into the study via snowball sampling (38). Subjects ( $n = 123$  and  $321$ , respectively) were  
386 provided with a GPS tracker programmed to record a location every three minutes to wear for at least  
387 one week. Participants wore the GPS for at least one week, with a subset of individuals agreeing to  
388 wear a new, freshly charged GPS for additional weeks ( $n = 76$ ; 61.8% and  $n=154$ ; 48.0% for  
389 Mandena and Sarahandrano, respectively). The close-contact networks were then imputed to  
390 account for individuals wearing GPS trackers in different weeks of the study. Edges in the network  
391 represent the probability a dyad came into close contact and the predicted proportion of 3 minute-  
392 periods of close-contact between dyads over the number of possible contacts in one week (details in  
393 supplement). We included edges with a weight above a threshold value equal to at least one hour of

394 contact during the week, resulting in final network sizes of 120 and 318 for the Mandena and  
395 Sarahandrano networks, respectively. To create a time-integrated network, we rescaled the weight so  
396 that a value of 1 corresponded to 24 hours in contact over the course of the week.

### 397 ***Epidemic Model Simulations***

398 At each time step, equivalent to one day, an individual could become susceptible, exposed, pre-  
399 symptomatic, infected (symptomatic and asymptomatic) or recovered (Fig. S2.1). For each contact  
400 event (e.g. edge between a susceptible and infected node), a susceptible individual's probability of  
401 becoming exposed was a function of the transmission probability  $\beta$  of the infected contact and the  
402 edge weight. Therefore, a susceptible individual's probability of becoming exposed at each time step  
403 was a function of how many infected contacts ( $j$ ) they were connected to on the network and their  
404 transmission rates ( $\beta_j$ ) (Eq. 1) :

405

$$P(i_{S \rightarrow E}) = 1 - \prod_j (1 - (1 - \beta_j)^{w_{ij}}) \quad \text{Equation 1}$$

406

407 Where  $i$  is the susceptible individual,  $j$  is the infected individual connected to  $i$ ,  $\beta_j$  is the time-  
408 dependent transmission rate of individual  $j$ , and  $w_{ij}$  is the edge-weight between nodes  $i$  and  $j$ .  
409 Individuals then moved through exposed, pre-symptomatic, infected, and recovered compartments  
410 following time-dependent transition rates.

411 Each transition event was drawn from a Bernoulli distribution defined by a daily transition  
412 probability rate. Time-dependent transition rates more accurately describe SARS-CoV-2 epidemic  
413 dynamics than memoryless transition rates, which assume transition rates are independent of the  
414 time spent in the compartment (39). Therefore, we relaxed the memoryless assumption of all  
415 transition rates, and parameterized the model to approximate an outbreak of SARS-CoV-2 Omicron  
416 variant. The incubation period ( $\alpha$ ) followed a gamma distribution with a mean of 3.1 days ( $sd$  2.6),  
417 including one day of pre-symptomatic transmission (40). The mean recovery period ( $\gamma$ ) followed a  
418 Poisson distribution with a mean of 9.67 days (41) (Fig. S2.2). We modeled waning immunity ( $\zeta$ ) using  
419 a gamma distribution with a mean of 90 days ( $sd$  20.12), parameterizing the scale of the distribution  
420 so that recovered individuals had a probability of becoming susceptible beginning 40 days post  
421 infection, with that probability increasing logistically until 150 days post-infection, when no immunity  
422 remained (Fig S2.2).

423 The transmission rate  $\beta$  was time-dependent: infected individuals had a transmission rate  
424 equal to  $\beta$  upon entering the infected class, and this transmission rate decreased exponentially as  
425 they spent more time infected (Fig. S2.3).  $\beta$  was parameterized to approximate realistic effective  
426 reproductive numbers at the beginning of the outbreak given the rapid susceptible depletion on  
427 smaller networks. This resulted in a mean estimated reproductive number of 8.99 on the Mandena  
428 network and 12.48 on the Sarahandrano network during the first 5 days (see supplement for further  
429 details), appropriate for a completely susceptible population exposed to the Omicron variant of  
430 SARS-CoV-2 (42). A range of transmission rates were explored via a sensitivity analysis reported

431 below. The pre-symptomatic transmission rate was defined as 50% of the infectious transmission rate  
432 (43). We assumed thirty percent (30%) of infected individuals were asymptomatic (44), and that  
433 asymptomatic individuals had a transmission rate equal to 30% of the transmission rate ( $\beta$ ) of  
434 symptomatic individuals during the pre-symptomatic and infectious stage (45). Further details on  
435 model specification are provided in the Supplemental Materials.

436 Each simulation was initiated by randomly selecting two individuals to be exposed. These  
437 exposed individuals thus started the simulation on the first day of their latent period. The number of  
438 susceptible, exposed, pre-symptomatic, infected (asymptomatic and symptomatic), isolated, and  
439 recovered individuals were recorded at each time step. Epidemics were simulated until no exposed,  
440 presymptomatic, infected, or isolated individuals remained, which we define as the full duration of the  
441 epidemic.

442

### 443 ***Evaluating Control Strategies***

444 We considered two different testing strategies. One strategy targeted testing based on social network  
445 connectivity. In this strategy, individuals were tested in order of descending degree centrality (e.g. the  
446 number of nodes they are connected to); hence, the most well-connected individuals were tested first.  
447 The other strategy tested individuals randomly, without consideration of network topology. We only  
448 considered passive surveillance, which tests infected, symptomatic individuals. Testing took place at  
449 the end of each simulated time-step (daily), after individuals had gone through transitions at that time  
450 step. To account for imperfect surveillance, symptomatic individuals that were identified to be tested  
451 had a 0.75 probability of being successfully contacted and tested. This parameter was explored  
452 further in the sensitivity analyses. Infected individuals that were positively identified via testing were  
453 isolated by moving them immediately to the isolated class. We did not include a delay between testing  
454 and isolation because we assumed diagnostics were limited to rapid antigen tests, which is more  
455 likely in Madagascar and other low-resource contexts given the limited resources for PCR diagnostics  
456 (29). Isolated individuals remained isolated until seven days post symptom onset, after which they  
457 moved to the recovered class.

458 Household transmission can reduce the effect of isolation on epidemic control by leading to  
459 imperfect isolation (46). Because the social networks did not include information on household  
460 membership, we approximated household transmission during isolation by allowing exposure events  
461 between an isolated, infected individual and susceptible contacts with an edge weight greater than 1  
462 (equivalent to an average 24 hours together over one week). The transmission rate during these  
463 exposure events was scaled by a factor of 0.4 to account for other behaviors (distancing, mask  
464 wearing) that an isolated individual would be practicing while under isolation (47).

465 In addition to two testing strategies, we considered low and high testing capacities,  
466 corresponding to monthly testing capacities of 25% and 100% of the total population. Testing began  
467 on day four of all simulations, with a range of start dates explored in the sensitivity analyses. All  
468 strategies, including a control of no testing, were simulated 1000 times.

469 We evaluated each strategy and testing capacity combination based on how efficiently it  
470 controlled the epidemic, defined as the time and resources spent until no exposed, pre-symptomatic,



471 infected, or isolated individuals remained. We used three metrics to evaluate the outcomes: the  
472 duration of the epidemic, the cumulative number of infected individuals per capita, and the number of  
473 tests used. We assessed each strategy and testing capacity based on its ability to reduce the  
474 infection burden and the length of the epidemic while minimizing the tests needed.

475

### 476 ***Sensitivity Analysis***

477 We assessed the robustness of our results by varying three categories of parameters in our  
478 simulations: intervention parameters (start date and imperfect surveillance rate), biological  
479 parameters (transmission rate), and network parameters (network size and assortativity). We  
480 compared the efficiency of the two different control strategies via the same measures used in the main  
481 analysis. Further details on these methods and results are reported in the Supplemental Materials.

482

### 483 ***Applying Control Strategies to Networks with Unknown Topologies***

484 To examine the applicability of these strategies to real-world scenarios, we compared the  
485 effectiveness of the two strategies when applied to a population where the true degree distribution is  
486 unknown and identification of individuals for targeted testing is derived from common socio-  
487 demographic variables. First, we fit a statistical model to predict each individual's degree percentile in  
488 their respective network using the following socio-demographic variables: age, gender, household  
489 size, marital status (single vs. cohabiting/married), and schooling level (none, primary, secondary,  
490 higher). The model was fit exploring all potential main effects of socio-demographic variables and  
491 interactions with gender. A final model was obtained by model averaging all models within 4 AIC units  
492 of the top model (48). The full details of model fitting are described in the Supplemental Materials.  
493 Using this model, we predicted an estimated degree percentile for each individual in the two  
494 networks. These predicted degree percentiles were then used to rank individuals by their estimated  
495 degree centrality and these rankings were used to prioritize testing in the targeted strategy. All other  
496 aspects of the simulations (e.g. transmission dynamics, control strategies) remained unchanged. We  
497 then compared the efficiency of the two control strategies on known and unknown network topologies,  
498 where testing was prioritized based on individuals' true and statistically-estimated degrees,  
499 respectively.

500

### 501 **ACKNOWLEDGMENTS**

502 We would like to thank the communities of Mandena and Sarahandrano for their participation in this  
503 study. We would also like to thank Jessica Metcalf for her feedback on earlier drafts of the  
504 manuscript.

505

### 506 **ETHICAL STATEMENT**

507 The Institutional Review Board (IRB) at Duke University (protocol no. 2019-0560) and Malagasy  
508 Ethics Panel (137 MSNP/SG/AGMED/CERBM du 26 août 2020) approved the survey protocols used

509 in this study. Participants in the social surveys and wearing GPS trackers provided written and verbal  
510 consent.

511

512

### 513 **DATA SHARING**

514 All code and data needed to reproduce the SEIR simulations will be freely available via a figshare  
515 repository upon publication. Socio-demographic data is protected under an existing data agreement  
516 and is only available upon request.

517

### 518 ***Contributors***

519 MVE, TR, and BR conceptualized the study. All authors contributed to designing the methodologies  
520 concerning data collection and analysis. KK, CN, JM, JYR, PR, TMR, VS, and GT collected the data  
521 and MVE, TR, KK, and GT conducted analyses. AG, CN, JM, and BR provided project supervision.  
522 MVE, KK, and GT wrote the initial draft of the manuscript. All authors contributed critically to the  
523 drafts and gave final approval for publication. All authors confirm that they had full access to all the  
524 data in the study and accept responsibility for submission for publication.

## 525 REFERENCES

1. Peeling RW, Heymann DL, Teo YY, Garcia PJ. Diagnostics for COVID-19: moving from pandemic response to control. *The Lancet*. 2022 Feb 19;399(10326):757–68.
2. Eyawo O, Viens AM. Rethinking the Central Role of Equity in the Global Governance of Pandemic Response. *Bioethical Inquiry*. 2020 Dec 1;17(4):549–53.
3. Nkengasong J. Let Africa into the market for COVID-19 diagnostics. *Nature*. 2020;580(7805):565–565.
4. Uyoga S, Adetifa IMO, Karanja HK, Nyagwange J, Tuju J, Wanjiku P, et al. Seroprevalence of anti-SARS-CoV-2 IgG antibodies in Kenyan blood donors. *Science* [Internet]. 2021; Available from: <https://www.science.org/doi/abs/10.1126/science.abe1916>
5. Schoenhals M, Rabenindrina N, Rakotondramanga JM, Dussart P, Randremanana R, Heraud JM, et al. SARS-CoV-2 antibody seroprevalence follow-up in Malagasy blood donors during the 2020 COVID-19 Epidemic. *EBioMedicine*. 2021;68:103419.
6. Ahoudi AD, Anderson M, Diédhiou CK, Dia A, Mbow M, Dia Y, et al. Seroprevalence of SARS-CoV-2 IgG Antibodies in a Healthcare setting During the First Wave in Senegal. *IJID Regions*. 2021;
7. Jacobs J, Kühne V, Lunguya O, Affolabi D, Hardy L, Vandenberg O. Implementing COVID-19 (SARS-CoV-2) Rapid Diagnostic Tests in Sub-Saharan Africa: A Review. *Frontiers in Medicine*. 2020;7:557797.
8. Botti-Lodovico Y, Rosenberg E, Sabeti PC. Testing in a Pandemic — Improving Access, Coordination, and Prioritization. *New England Journal of Medicine*. 2021;384(3):197–9.
9. Block P, Hoffman M, Raabe IJ, Dowd JB, Rahal C, Kashyap R, et al. Social network-based distancing strategies to flatten the COVID-19 curve in a post-lockdown world. *Nat Hum Behav*. 2020 Jun;4(6):588–96.
10. Cui Y, Ni S, Shen S. A network-based model to explore the role of testing in the epidemiological control of the COVID-19 pandemic. *BMC Infectious Diseases*. 2021 Jan 12;21(1):58.
11. Firth JA, Hellewell J, Klepac P, Kissler S, Kucharski AJ, Spurgin LG. Using a real-world network to model localized COVID-19 control strategies. *Nat Med*. 2020;26(10):1616–22.
12. Nielsen BF, Simonsen L, Sneppen K. COVID-19 Superspreading Suggests Mitigation by Social Network Modulation. *Phys Rev Lett*. 2021;126(11):118301.
13. Voigt A, Martyushenko N, Karlsen E, Hall M, Nyhamar K, Omholt SW, et al. Containing pandemics through targeted testing of households. *BMC Infectious Diseases*. 2021 Jun 9;21(1):548.
14. Susswein Z, Bansal S. Characterizing superspreading of SARS-CoV-2 : from mechanism to measurement. *medRxiv*. 2020;2020.12.08.20246082.
15. Riley S. Large-Scale Spatial-Transmission Models of Infectious Disease. *Science*. 2007;316(5829):1298–301.

16. Ma J, van den Driessche P, Willeboordse FH. The importance of contact network topology for the success of vaccination strategies. *J Theor Biol.* 2013 May 21;325:12–21.
17. Prem K, Cook AR, Jit M. Projecting social contact matrices in 152 countries using contact surveys and demographic data. *PLOS Computational Biology.* 2017 Sep 12;13(9):e1005697.
18. Fernandes A, Gonçalves PCT, Campos P, Delgado C. Centrality and community detection: a co-marketing multilayer network. *JBIM.* 2019 Oct 7;34(8):1749–62.
19. Kauffman K, Werner CS, Titcomb G, Pender M, Rabezara JY, Herrera JP, et al. Comparing transmission potential networks based on social network surveys, close contacts and environmental overlap in rural Madagascar. *Journal of The Royal Society Interface.* 2021;19(186):20210690.
20. Lee W, Hwang SS, Song I, Park C, Kim H, Song IK, et al. COVID-19 in South Korea: epidemiological and spatiotemporal patterns of the spread and the role of aggressive diagnostic tests in the early phase. *International Journal of Epidemiology.* 2020;49(4):1106–16.
21. Jefferies S, French N, Gilkison C, Graham G, Hope V, Marshall J, et al. COVID-19 in New Zealand and the impact of the national response: a descriptive epidemiological study. *The Lancet Public Health.* 2020;5(11):e612–23.
22. Rice BL, Annapragada A, Baker RE, Bruijning M, Dotse-Gborgbortsi W, Mensah K, et al. Variation in SARS-CoV-2 outbreaks across sub-Saharan Africa. *Nature Medicine.* 2021;1–7.
23. Rosenthal PJ, Breman JG, Djimde AA, John CC, Kanya MR, Leke RGF, et al. COVID-19: Shining the Light on Africa. *The American Journal of Tropical Medicine and Hygiene.* 2020;102(6):1145–8.
24. Christakis NA, Fowler JH. Social Network Sensors for Early Detection of Contagious Outbreaks. *PLOS ONE.* 2010;5(9):e12948.
25. Sneppen K, Nielsen BF, Taylor RJ, Simonsen L. Overdispersion in COVID-19 increases the effectiveness of limiting nonrepetitive contacts for transmission control. *PNAS.* 2021;118(14).
26. Rendremanana RV, Andriamandimby S, Rakotondramanga JM, Razanajatovo NH, Mangahasimbola RT, Randriambolamanantsoa TH, et al. The COVID 19 epidemic in Madagascar: clinical description and laboratory results of the first wave, March September 2020. *Influenza Other Respir Viruses.* 2021;15(4):457–68.
27. Pavelka M, Van-Zandvoort K, Abbott S, Sherratt K, Majdan M, CMMID COVID-19 working group, et al. The impact of population-wide rapid antigen testing on SARS-CoV-2 prevalence in Slovakia. *Science.* 2021;372(6542):635–41.
28. Ouma PO, Maina J, Thurania PN, Macharia PM, Alegana VA, English M, et al. Access to emergency hospital care provided by the public sector in sub-Saharan Africa in 2015: a geocoded inventory and spatial analysis. *The Lancet Global Health.* 2018;6(3):e342–50.
29. Rakotonanahary RJL, Andriambolamanana H, Razafinjato B, Raza-Fanomezanjanahary EM, Ramanandraitsiory V, Ralaivavikoa F, et al. Integrating Health Systems and Science to Respond to COVID-19 in a Model District of Rural Madagascar. *Front Public Health.* 2021;9:654299.
30. Jensen N, Kelly AH, Avendano M. The COVID-19 pandemic underscores the need for an equity-focused global health agenda. *Humanit Soc Sci Commun.* 2021;8(1):1–6.

31. Christley RM, Pinchbeck GL, Bowers RG, Clancy D, French NP, Bennett R, et al. Infection in Social Networks: Using Network Analysis to Identify High-Risk Individuals. *American Journal of Epidemiology*. 2005 Nov 15;162(10):1024–31.
32. Pellis L, Ball F, Bansal S, Eames K, House T, Isham V, et al. Eight challenges for network epidemic models. *Epidemics*. 2015 Mar 1;10:58–62.
33. Bansal S, Pourbohloul B, Meyers LA. A Comparative Analysis of Influenza Vaccination Programs. *PLOS Medicine*. 2006 Oct 3;3(10):e387.
34. Read JM, Eames KTD, Edmunds WJ. Dynamic social networks and the implications for the spread of infectious disease. *J R Soc Interface*. 2008;5(26):1001–7.
35. Bansal S, Read J, Pourbohloul B, Meyers LA. The dynamic nature of contact networks in infectious disease epidemiology. *Journal of Biological Dynamics*. 2010;4(5):478–89.
36. Hoang T, Coletti P, Melegaro A, Wallinga J, Grijalva CG, Edmunds JW, et al. A Systematic Review of Social Contact Surveys to Inform Transmission Models of Close-contact Infections. *Epidemiology*. 2019;30(5):723–36.
37. Aleta A, Arruda GF de, Moreno Y. Data-driven contact structures: From homogeneous mixing to multilayer networks. *PLOS Computational Biology*. 2020;16(7):e1008035.
38. Naderifar M, Goli H, Ghaljaie F. Snowball Sampling: A Purposeful Method of Sampling in Qualitative Research. *Strides in Development of Medical Education*. 2017;14(3).
39. Sofonea MT, Reyné B, Elie B, Djidjou-Demasse R, Selinger C, Michalakis Y, et al. Memory is key in capturing COVID-19 epidemiological dynamics. *Epidemics*. 2021;35:100459.
40. Backer JA, Klinkenberg D, Wallinga J. Incubation period of 2019 novel coronavirus (2019-nCoV) infections among travellers from Wuhan, China, 20–28 January 2020. *Eurosurveillance*. 2020;25(5):2000062.
41. Ribeiro Xavier C, Sachetto Oliveira R, da Fonseca Vieira V, Lobosco M, Weber dos Santos R. Characterisation of Omicron Variant during COVID-19 Pandemic and the Impact of Vaccination, Transmission Rate, Mortality, and Reinfection in South Africa, Germany, and Brazil. *BioTech*. 2022 Jun;11(2):12.
42. Liu Y, Rocklöv J. The effective reproductive number of the Omicron variant of SARS-CoV-2 is several times relative to Delta. *J Travel Med*. 2022 Mar 9;29(3):taac037.
43. Muggleston MA, Ratnaraja NV, Bak A, Islam J, Wilson JA, Bostock J, et al. Presymptomatic, asymptomatic and post-symptomatic transmission of SARS-CoV-2: joint British Infection Association (BIA), Healthcare Infection Society (HIS), Infection Prevention Society (IPS) and Royal College of Pathologists (RCPath) guidance. *BMC Infectious Diseases*. 2022 May 12;22(1):453.
44. Alene M, Yismaw L, Assemie MA, Ketema DB, Mengist B, Kassie B, et al. Magnitude of asymptomatic COVID-19 cases throughout the course of infection: A systematic review and meta-analysis. *PLOS ONE*. 2021;16(3):e0249090.
45. Bi Q, Lessler J, Eckerle I, Lauer SA, Kaiser L, Vuilleumier N, et al. Insights into household transmission of SARS-CoV-2 from a population-based serological survey. *Nat Commun*. 2021;12(1):3643.

46. Lei H, Xu X, Xiao S, Wu X, Shu Y. Household transmission of COVID-19-a systematic review and meta-analysis. *Journal of Infection*. 2020 Dec 1;81(6):979–97.
47. Chu VT, Yousaf AR, Chang K, Schwartz NG, McDaniel CJ, Lee SH, et al. Household Transmission of SARS-CoV-2 from Children and Adolescents. *New England Journal of Medicine*. 2021 Sep 2;385(10):954–6.
48. Symonds MRE, Moussalli A. A brief guide to model selection, multimodel inference and model averaging in behavioural ecology using Akaike’s information criterion. *Behav Ecol Sociobiol*. 2011;65(1):13–21.
